# Supplementary material for: Effects of Early Motor Interventions on Gross Motor and Locomotor Development for Infants at-Risk of Motor Delay: A Systematic Review
Source: PubMed Central journal article supplement (PMC9096078; doi:10.3389/fped.2022.877345), 2022-04-28
Supplement: Table_1.pdf [file Table_1.pdf]

**Table SI:** Mallen scores: extended methodological quality assessment

| Mallen quality criteria                                                                                   | Ulrich et al.2001 | Ulrich et al.2008 | Angulo-Barroso et al.2013 | Campbell et al. 2012 | Lee & Samson 2019 | Schlitter et al. 2011 | Kolobe & Fagg 2019 | Wentz 2017 | Cameron et al. 2005 | Ustad et al.2009 |
|-----------------------------------------------------------------------------------------------------------|-------------------|-------------------|---------------------------|----------------------|-------------------|-----------------------|--------------------|------------|---------------------|------------------|
| Accurate and appropriate outcome measures in all participants <i>available for follow-up</i> <sup>a</sup> | 1                 | 1                 | 1                         | 0                    | 1                 | 0                     | 1                  | 1          | 0                   | 0                |
| Adjustment for confounding by <i>multivariable statistic or subgroup analysis</i> <sup>a</sup>            | 1                 | 1                 | 1                         | 0                    | 1                 | 0                     | 0                  | 1          | 1                   | 0                |
| Cases and controls from same population <sup>a</sup>                                                      | 1                 | 1                 | 0                         | 1                    | 0                 | 0                     | 0                  | 1          | 1                   | 0                |
| Loss to <i>final</i> follow-up ( <i>appropriate level, i.e. &lt;20%</i> ) <sup>a</sup>                    | 0                 | 0                 | 1                         | 1                    | 1                 | 0                     | 0                  | 1          | 1                   | 0                |
| Appropriate statistical tests used, and tests described                                                   | 1                 | 1                 | 1                         | 1                    | 1                 | 1                     | 1                  | 1          | 1                   | 1                |
| Participants representative of population <sup>a</sup>                                                    | 1                 | 1                 | 0                         | 1                    | 0                 | 0                     | 0                  | 1          | 1                   | 0                |
| Potential confounders described <sup>a</sup>                                                              | 1                 | 1                 | 1                         | 1                    | 1                 | 0                     | 0                  | 0          | 1                   | 1                |
| Recruitment of case/control over same time frame (or similar point of disease) <sup>a</sup>               | 1                 | 0                 | 1                         | 1                    | 0                 | 1                     | 0                  | 0          | 1                   | 0                |
| Blinding (assessors) <sup>a</sup>                                                                         | 0                 | 0                 | 0                         | 1                    | 0                 | 0                     | 1                  | 0          | 1                   | 1                |
| Participants characteristics described <sup>b</sup>                                                       | 1                 | 1                 | 1                         | 1                    | 0                 | 0                     | 0                  | 0          | 1                   | 0                |



|                                               |           |           |           |           |           |           |           |           |           |           |
|-----------------------------------------------|-----------|-----------|-----------|-----------|-----------|-----------|-----------|-----------|-----------|-----------|
| Conclusion supported by findings <sup>e</sup> | 1         | 1         | 1         | 1         | 1         | 0         | 1         | 1         | 1         | 1         |
| <b>Total score (max 25)</b>                   | <b>22</b> | <b>22</b> | <b>20</b> | <b>22</b> | <b>16</b> | <b>13</b> | <b>16</b> | <b>19</b> | <b>22</b> | <b>13</b> |

4

5 Adapted Mallen score<sup>28</sup>: the highest possible score is 25. 1=yes; 0=no. If the paper did not provide information needed for a criterion a 'no'-score was assigned. \* determined  
6 on the basis of additional information provided by the authors.

7 <sup>a</sup>Criterion indicating risk of bias

8 <sup>b</sup>At least description of 1) frequencies of specific brain lesions or prevalence of CP; 2) gestational age at birth or proportion of preterm infants; 3) birth weight or proportion  
9 of infants with low birth weight; the three criteria need to be met in order to score 'yes'.

10 <sup>c</sup>Brain lesions: criteria should be specified, either in the text or with appropriate reference; for a diagnosis of CP infants should be at least  $\geq 12$  mo CA.

11 <sup>d</sup>Clear hypothesis means that the paper specifies with a hypothesis or specific research question which effects of intervention are expected, by specifying the type of effect of  
12 the intervention.

13 <sup>e</sup>The criterion is not met if the conclusion summarises findings correctly, e.g., reports that no statistically significant differences between study and control group were  
14 found, but nevertheless concludes that the study supports a favourable effect of the intervention.

15
